# Supplementary material for: Rapid discovery of new Eu2+-activated phosphors with a designed luminescence color using a data-driven approach
Source: Royal Society of Chemistry journal article supplement (doi:10.1039/d2ma00881e), 2022-11-29
Supplement: d2ma00881e1.pdf [file d2ma00881e1.pdf]

## Supplementary Information

### Rapid Discovery of New $\text{Eu}^{2+}$ -Activated Phosphors with a Designed Luminescence Color by a Data-Driven Approach

Yukinori Koyama,<sup>\*a</sup> Hidekazu Ikeno,<sup>b</sup> Masamichi Harada,<sup>c</sup> Shiro Funahashi,<sup>c</sup> Takashi Takeda<sup>c</sup> and Naoto Hirosaki<sup>c</sup>

<sup>a</sup> Research and Services Division of Materials Data and Integrated System, National Institute for Materials Science, Tsukuba, Ibaraki 305-0044, Japan

<sup>b</sup> Department of Materials Science, Graduate School of Engineering, Osaka Metropolitan University, Sakai, Osaka 599-8570, Japan

<sup>c</sup> Research Center for Functional Materials, National Institute for Materials Science, Tsukuba, Ibaraki 305-0044, Japan

\* Email: KOYAMA.Yukinori@nims.go.jp

Table S1. List of elemental features used for the general-purpose features. The elemental features were obtained from the XenonPy package (Ref. 23).

| <b>Elemental feature</b>              |
|---------------------------------------|
| Atomic number                         |
| Period                                |
| Group                                 |
| Atomic mass                           |
| Number of valence electrons           |
| Number of valence s electrons         |
| Number of valence p electrons         |
| Number of valence d electrons         |
| Number of valence f electrons         |
| Number of unoccupied valence states   |
| Number of unoccupied valence s states |
| Number of unoccupied valence p states |
| Number of unoccupied valence d states |
| Number of unoccupied valence f states |
| Atomic radius                         |
| Covalent radius                       |
| Van de Waals radius                   |
| Electronegativity                     |
| Electron affinity                     |
| First ionization energy               |
| Mendelev number                       |
| Polarizability                        |

Table S2. List of statistics used for the general-purpose features.  $f_i$  and  $w_i$  ( $\sum_i w_i = 1$ ) denote an elemental feature and atomic fraction of element  $i$ , respectively.  $n$  denotes the number of elements.

| Statistic                   | Equation                                                            |
|-----------------------------|---------------------------------------------------------------------|
| Weighted arithmetic mean    | $f_{\text{mean}} = \sum_{i=1}^n w_i f_i$                            |
| Weighted geometric mean     | $f_{\text{g-mean}} = \prod_{i=1}^n f_i^{w_i}$                       |
| Weighted harmonic mean      | $f_{\text{h-mean}} = \frac{1}{\sum_{i=1}^n \frac{w_i}{f_i}}$        |
| Weighted standard deviation | $f_{\text{sd}} = \sqrt{\sum_{i=1}^n w_i (f_i - f_{\text{mean}})^2}$ |
| Minimum                     | $f_{\text{min}} = \min\{f_i\}$                                      |
| Maximum                     | $f_{\text{max}} = \max\{f_i\}$                                      |
| Range                       | $f_{\text{range}} = f_{\text{max}} - f_{\text{min}}$                |

Table S3. Feature-selection and regression pipeline, parameter ranges and optimized values of the a) ridge, b) automatic relevance determination (ARD), c) random forest (RF), d) gradient boosted regression trees (GB), and e) bagging of GB models. Classes and functions in the scikit-learn package are listed without their module names.

a) Ridge

| Estimator         | Parameter            | Range                             | Optimized value               |
|-------------------|----------------------|-----------------------------------|-------------------------------|
| VarianceThreshold | threshold            | Fixed                             | 1.0e-7                        |
| StandardScaler    |                      |                                   |                               |
| SelectKBest       | score_func           | Fixed                             | mutual_info_regression        |
|                   | k                    | 100, 150, ..., 350                | 300                           |
| RFE               | estimator            | Fixed                             | Ridge<br>(default parameters) |
|                   | n_features_to_select | 10, 20, ..., 100                  | 90                            |
|                   | step                 | Fixed                             | 10                            |
| Ridge             | alpha                | [1.0e-6, 1.0e+6]<br>(log-uniform) | 35.1                          |

b) ARD

| Estimator         | Parameter            | Range                             | Optimized value                       |
|-------------------|----------------------|-----------------------------------|---------------------------------------|
| VarianceThreshold | threshold            | Fixed                             | 1.0e-7                                |
| StandardScaler    |                      |                                   |                                       |
| SelectKBest       | score_func           | Fixed                             | mutual_info_regression                |
|                   | k                    | 100, 150, ..., 350                | 350                                   |
| RFE               | estimator            | Fixed                             | ARDRegression<br>(default parameters) |
|                   | n_features_to_select | 10, 20, ..., 100                  | 60                                    |
|                   | step                 | Fixed                             | 10                                    |
| ARDRegression     | alpha_1              | [0.0, 1.0]<br>(uniform)           | 0.734                                 |
|                   | alpha_2              | [1.0e-6, 1.0e+6]<br>(log-uniform) | 1.73e-5                               |
|                   | lambda_1             | [0.0, 1.0]<br>(uniform)           | 0.335                                 |
|                   | lambda_2             | [1.0e-6, 1.0e+6]<br>(log-uniform) | 0.494                                 |
|                   | threshold_lambda     | [1.0e+2, 1.0e+6]<br>(log-uniform) | 4.65e+4                               |

c) RF

| Estimator             | Parameter            | Range              | Optimized value                               |
|-----------------------|----------------------|--------------------|-----------------------------------------------|
| VarianceThreshold     | threshold            | Fixed              | 1.0e-7                                        |
| StandardScaler        |                      |                    |                                               |
| SelectKBest           | score_func           | Fixed              | mutual_info_regression                        |
|                       | k                    | 100, 150, ..., 350 | 350                                           |
| RFE                   | estimator            | Fixed              | RandomForestRegressor<br>(default parameters) |
|                       | n_features_to_select | 10, 20, ..., 100   | 100                                           |
|                       | step                 | Fixed              | 10                                            |
| RandomForestRegressor | max_depth            | 1, 2, ..., 20      | 13                                            |
|                       | min_samples_leaf     | 1, 2, 3            | 1                                             |
|                       | n_estimators         | 50, 60, ..., 200   | 180                                           |

d) GB

| <b>Estimator</b>          | <b>Parameter</b>     | <b>Range</b>                 | <b>Optimized value</b>                            |
|---------------------------|----------------------|------------------------------|---------------------------------------------------|
| VarianceThreshold         | threshold            | Fixed                        | 1.0e-7                                            |
| StandardScaler            |                      |                              |                                                   |
| SelectKBest               | score_func           | Fixed                        | mutual_info_regression                            |
|                           | k                    | 100, 150, ..., 350           | 350                                               |
| RFE                       | estimator            | Fixed                        | GradientBoostingRegressor<br>(default parameters) |
|                           | n_features_to_select | 10, 20, ..., 100             | 70                                                |
|                           | step                 | Fixed                        | 10                                                |
| GradientBoostingRegressor | learning_rate        | [0.01, 0.5]<br>(log-uniform) | 0.111                                             |
|                           | max_depth            | 1, 2, ..., 5                 | 3                                                 |
|                           | n_estimators         | 100, 200, ..., 1000          | 900                                               |

e) Bagging of GB

| Estimator                                     | Parameter            | Range                        | Optimized value                                   |
|-----------------------------------------------|----------------------|------------------------------|---------------------------------------------------|
| VarianceThreshold                             | threshold            | Fixed                        | 1.0e-7                                            |
| StandardScaler                                |                      |                              |                                                   |
| SelectKBest                                   | score_func           | Fixed                        | mutual_info_regression                            |
|                                               | k                    | 100, 150, ..., 350           | 350                                               |
| RFE                                           | estimator            | Fixed                        | GradientBoostingRegressor<br>(default parameters) |
|                                               | n_features_to_select | 10, 20, ..., 100             | 100                                               |
|                                               | step                 | Fixed                        | 10                                                |
| BaggingRegressor                              | base_estimator       | Fixed                        | GradientBoostingRegressor                         |
|                                               | n_estimators         | Fixed                        | 25                                                |
| GradientBoostingRegressor<br>(base_estimator) | learning_rate        | [0.01, 0.5]<br>(log-uniform) | 0.213                                             |
|                                               | max_depth            | 1, 2, ..., 5                 | 3                                                 |
|                                               | n_estimators         | 100, 200, ..., 1000          | 400                                               |



Table S4. Mean absolute error (MAE), root mean squared error (RMSE), and coefficient of determination ( $R^2$ ) of the machine learning on emission peak energy using the bagging of the gradient boosted regression trees method for the training and validation data in the cross validation. The scores were averaged among the folds of the cross validation. Standard deviations among the folds are shown in parentheses.

| Score     | Training    | Validation  |
|-----------|-------------|-------------|
| MAE / eV  | 0.05 (0.00) | 0.13 (0.03) |
| RMSE / eV | 0.07 (0.00) | 0.16 (0.05) |
| $R^2$     | 0.97 (0.00) | 0.78 (0.16) |

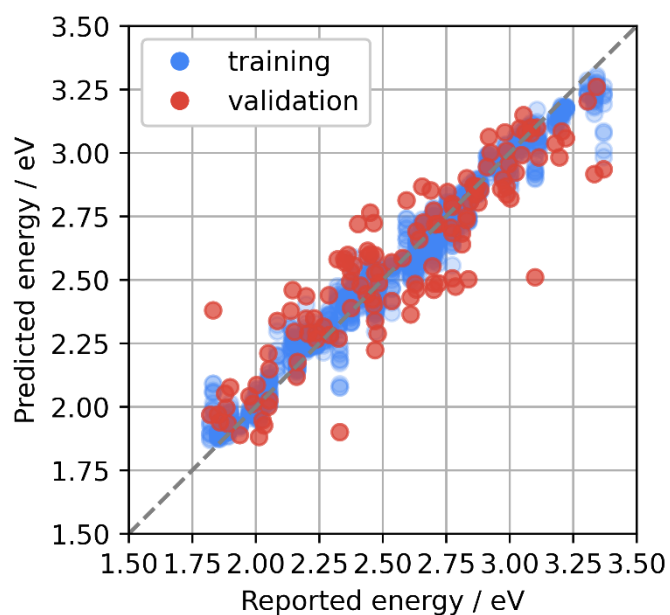

Figure S1. Predicted emission peak energies with respect to reported values for the training (blue) and validation (red) data in the cross validation using the bagging of the gradient boosted regression trees method.

a)  $\text{Li}_2\text{Ca}_4\text{Si}_4\text{O}_{13}$

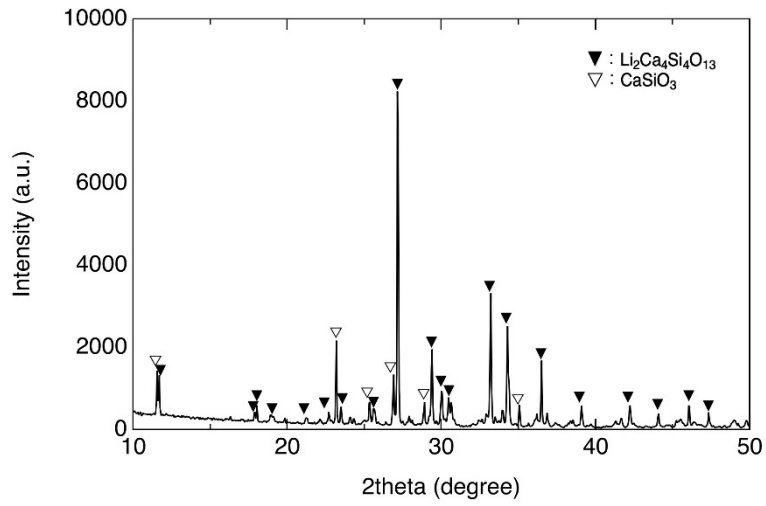

b)  $\text{Na}_2\text{Ca}_2\text{Si}_2\text{O}_7$

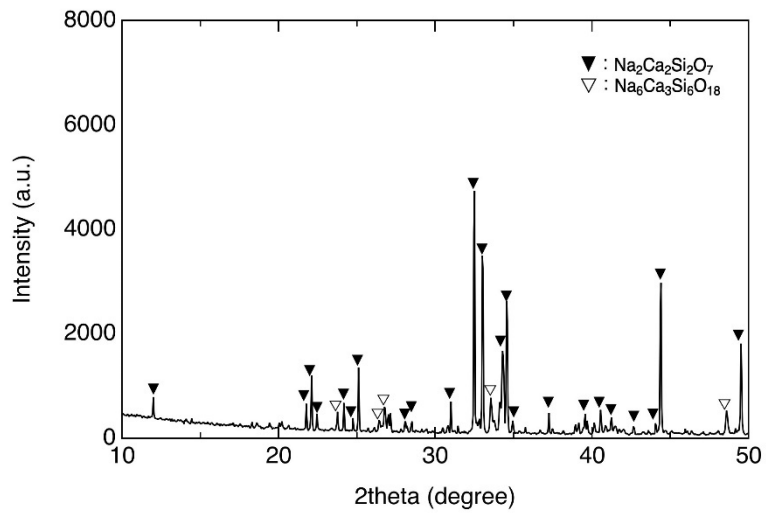

c)  $\text{SrLaGaO}_4$

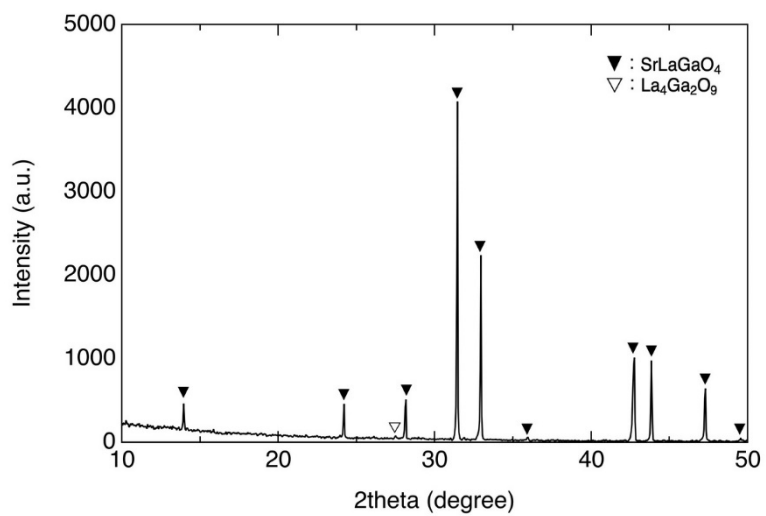

Figure S2. XRD patterns of powder samples of Eu-doped (a)  $\text{Li}_2\text{Ca}_4\text{Si}_4\text{O}_{13}$ , (b)  $\text{Na}_2\text{Ca}_2\text{Si}_2\text{O}_7$ , and (c)  $\text{SrLaGaO}_4$ .
